# Supplementary material for: Synthesis and Deposition of Silver Nanowires on Porous Silicon as an Ultraviolet Light Photodetector
Source: MDPI journal article supplement (doi:10.3390/nano13020353), 2023-01-15
Supplement: s1 [file s1]

# Synthesis and Deposition of Silver Nanowires on Porous Silicon as an Ultraviolet Light Photodetector

Anas A. M. Alqanoo<sup>1,2</sup>, Naser M. Ahmed<sup>1,3\*</sup>, M.R. Hashim<sup>1</sup>, Munirah A. Almessiere<sup>4,5</sup>, Sofyan A. Taya<sup>2</sup>, Osamah A. Aldaghri<sup>6</sup> and Khalid Hassan Ibnaouf<sup>6\*</sup>

<sup>1</sup>School of Physics, Universiti Sains Malaysia, 11800 Penang, Malaysia

<sup>2</sup>Physics Department, Islamic University of Gaza, P.O. Box 108, Gaza, Palestine

<sup>3</sup>The University of Mashreq, Research Center, Baghdad, Iraq

<sup>4</sup>Department of physics, college of science, imam abdulrahman bin faisal university, P.O BOX 1982, Dammam 31441, Saudi Arabia

<sup>5</sup>Department of Biophysics, Institute for Research & Medical Consultations (IRMC), Imam Abdulrahman Bin Faisal University, P.O. Box 1982, 31441, Dammam, Saudi Arabia

<sup>6</sup>Department of Physics Department. College of Science, Imam Mohammed Ibn Saud Islamic University (IMSIU), Riyadh 13318, Saudi Arabia

## S1. X-ray diffraction analysis

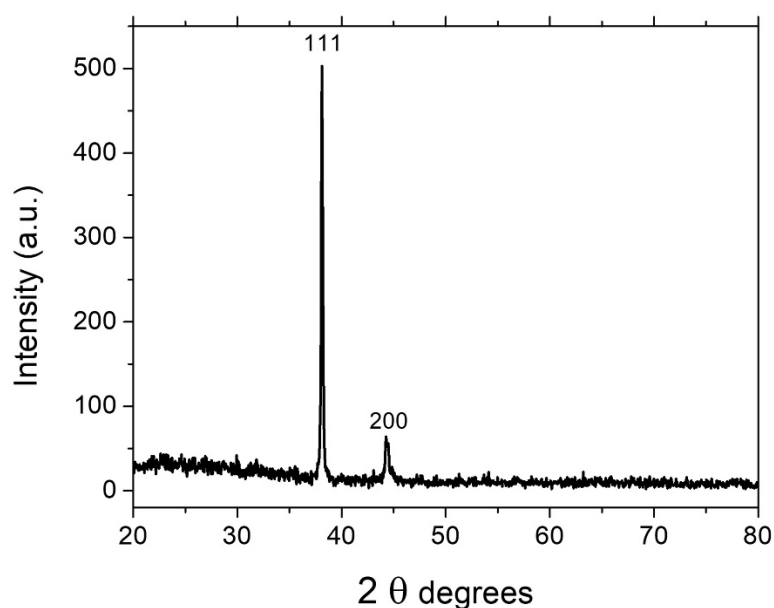

Figure S1. XRD pattern of the AgNWs.

**S2. The transmittance spectrum of the AgNWs film on glass**

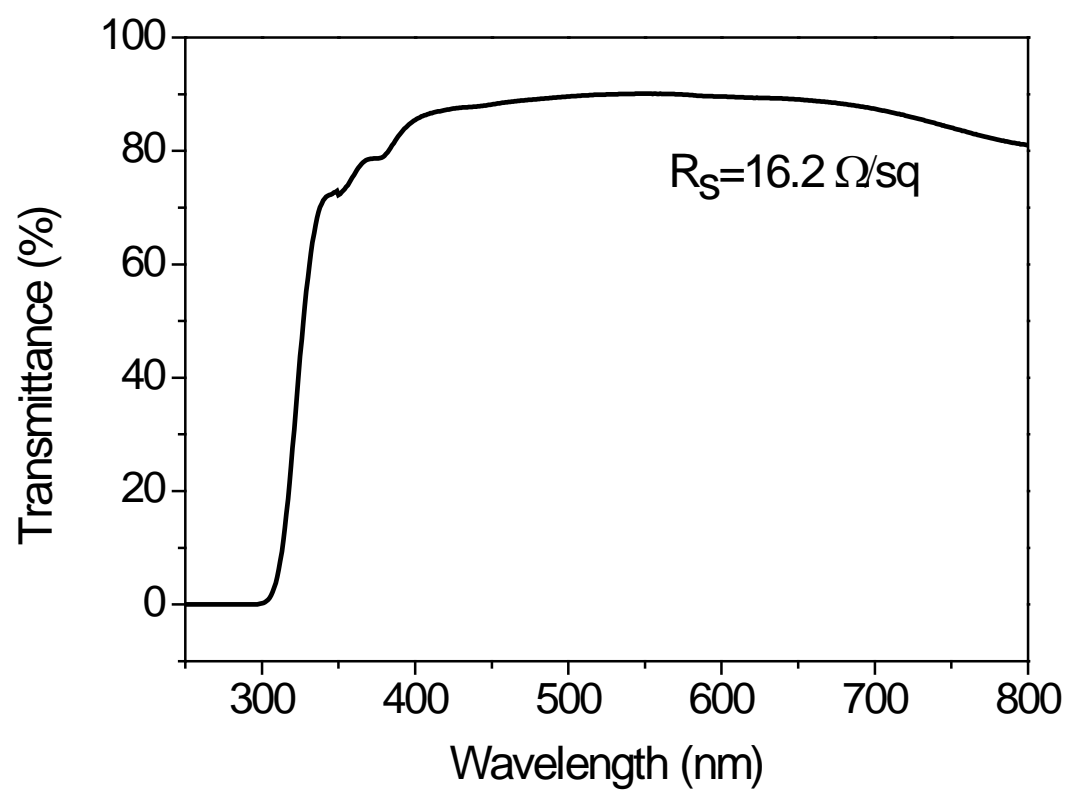

**Figure S2.** The transmittance of AgNWs thin film coated on the glass with sheet resistance of 16.2  $\Omega/\text{sq}$ .
